# Supplementary material for: High performing hospitals: a qualitative systematic review of associated factors and practical strategies for improvement
Source: PubMed Central journal article supplement (PMC4478709; doi:10.1186/s12913-015-0879-z), 2015-06-24
Supplement: 12913_2015_879_MOESM2_ESM.pdf [file 12913_2015_879_MOESM2_ESM.pdf]

## Final search

1. ((hospital\* adj6 rank) or (hospital\* adj6 perform\*) or (hospital\* adj6 benchmark\*) or (hospital\* adj6 standard\*) or (hospital\* adj6 score\*) or (hospital\* adj6 balanced scorecard\*) or (hospital\* adj6 excellence) or (high\* adj6 rank\*) or (hospital\* adj6 low\*) or (hospital\* adj6 high\*)).tw.
2. health care surveys/ or interviews as topic/ or focus groups/ or questionnaires/ or self report/
3. case stud\*.mp.
4. field notes.mp.
5. (perception\* or belief\*).tw.
6. (health surve\* or interview\* or focus group\*).tw.
7. qualitative research/
8. (qualitative study\* or ethnograph\*).tw.
9. 2 or 3 or 4 or 5 or 6 or 7 or 8
10. 1 and 9
11. "high-perform\*".tw.
12. "low-perform\*".tw.
13. "top-perform\*".tw.
14. "bottom-perform\*".tw.
15. ((organisation\* adj6 high\*) or (organisation\* adj6 low\*) or (organization\* adj6 high\*) or (organization\* adj6 low\*)).tw.
16. ((organisation\* adj6 top\*) or (organisation\* adj6 bottom\*) or (organization\* adj6 top\*) or (organization\* adj6 bottom\*)).tw.
17. 1 or 11 or 12 or 13 or 14 or 15 or 16
18. 9 and 17
19. health\*.mp.
20. 18 and 19
21. limit 20 to (english language and yr="2000 -Current")
22. A qualitative assessment of practices associated with shorter door-to-needle time for thrombolytic therapy in acute ischemic stroke.m\_titl.
23. What distinguishes top-performing hospitals in acute myocardial infarction mortality rates? A qualitative study.m\_titl.
24. (Cultural characteristics of 'high' and 'low' performing hospitals).m\_titl.
25. (Organizational factors associated with high performance in quality and safety in academic medical centers).m\_titl.
26. (Organizational characteristics of high- and low-performing anticoagulation clinics in the Veterans Health Administration).m\_titl.
27. limit 18 to (english language and yr="2000 -Current")
28. 22 and 27
29. 23 and 27

30. 24 and 27

31. 25 and 27

32. 26 and 27
